# Supplementary material
Source: publisher site journal article supplement (https://www.dovepress.com/article/226798)
Supplement: Supplementary file 1 [file get_supplementary_file.php]

## Supporting Information

**Table S1.** Characteristic properties of DOX-loaded PMs.

| Polymer<br>(mg) | DOX<br>(mg) | LC<br>(%) | EE<br>(%) | Particle<br>size (nm) | PDI   | Zeta-potential<br>(mV) |
|-----------------|-------------|-----------|-----------|-----------------------|-------|------------------------|
| 50              | 0           | -         | -         | 120.2                 | 0.151 | -2.7                   |
|                 | 10          | 5.5       | 36.4      | 128.5                 | 0.201 | -1.8                   |
|                 | 15          | 9.6       | 40.2      | 130.7                 | 0.215 | -1.5                   |
|                 | 25          | 11.8      | 34.3      | 131.4                 | 0.228 | -0.4                   |

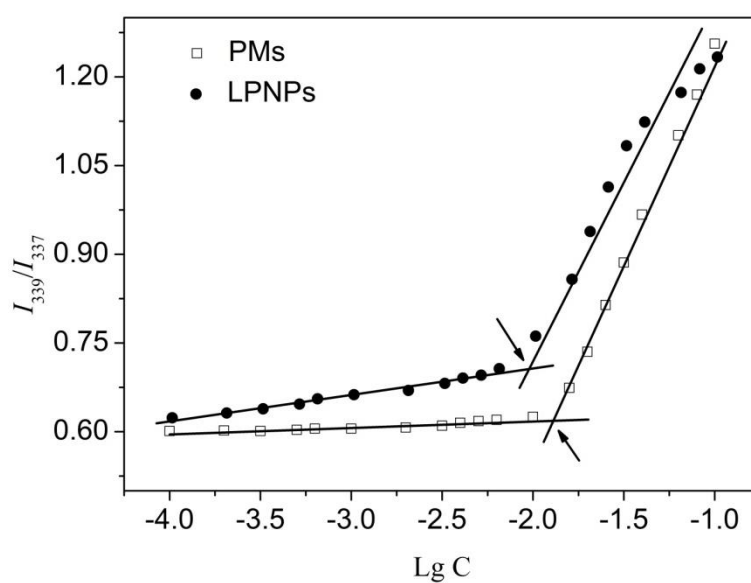

**Figure S1** Plot of intensity ratios ( $I_{339}/I_{337}$ ) as function of logarithm of the the PMs and LPNPs (7 % of DSPE-mPEG, mole ratio) concentration (B) in PBS buffer solution at pH 7.4.

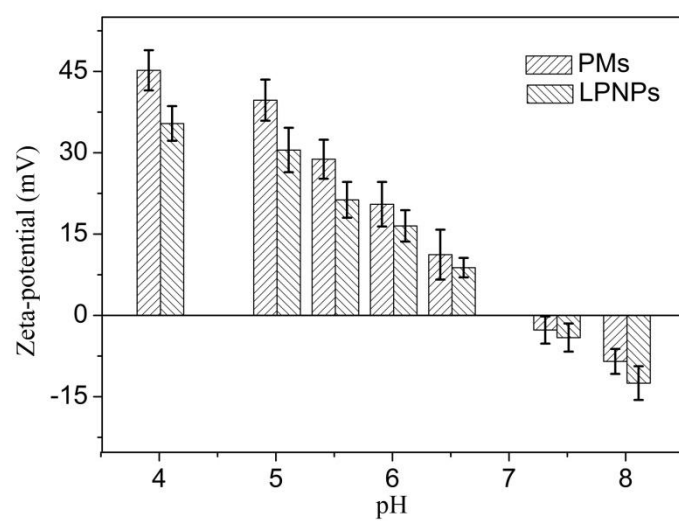

**Figure S2** The zeta-potential (D) of PMs and LPNPs (7 % of DSPE-mPEG, mole ratio) at different pH values (n = 3, mean  $\pm$  SD).
